# Supplementary material for: The origin of a large apparent tortuosity factor for the Knudsen diffusion inside monoliths of a samaria–alumina aerogel catalyst: a diffusion NMR study
Source: Royal Society of Chemistry journal article supplement (doi:10.1039/c5cp04609b), 2015-01-01
Supplement: c5cp04609b1.pdf [file c5cp04609b1.pdf]

## Supplementary Information

### The origin of a large apparent tortuosity factor for Knudsen diffusion in a samaria aerogel catalyst: a diffusion NMR study

Robert Mueller,<sup>1</sup> Suihua Zhang,<sup>1</sup> Miriam Klink,<sup>2</sup> Marcus Bäumer<sup>2</sup>  
and Sergey Vasenkov<sup>1,a</sup>

<sup>1</sup>*Department of Chemical Engineering, University of Florida, Gainesville, FL 32611 USA*

<sup>2</sup>*Institute for Applied and Physical Chemistry, University of Bremen, 28359, Bremen, Germany*

**Table S1.** Data used in the least-squares regression to Eq. 4 and the resulting values of  $D_p$  model.

| $p$<br>kPa | $D_{g0}$<br>$\text{m}^2\text{s}^{-1} (\times 10^{-5})$ | $D_{K0}$<br>$\text{m}^2\text{s}^{-1} (\times 10^{-5})$ | $D_{intra}$<br>$\text{m}^2\text{s}^{-1} (\times 10^{-5})$ | $D_p$ model<br>$\text{m}^2\text{s}^{-1} (\times 10^{-5})$ |
|------------|--------------------------------------------------------|--------------------------------------------------------|-----------------------------------------------------------|-----------------------------------------------------------|
| 10         | $13. \pm 2$                                            | 0.94                                                   | $0.15 \pm 0.03$                                           | $0.14 \pm 0.04$                                           |
| 30         | $4.0 \pm 0.8$                                          | 0.94                                                   | $0.14 \pm 0.03$                                           | $0.14 \pm 0.05$                                           |
| 91         | $1.5 \pm 0.3$                                          | 0.94                                                   | $0.12 \pm 0.02$                                           | $0.12 \pm 0.03$                                           |
| 310        | $0.4 \pm 0.08$                                         | 0.94                                                   | $0.079 \pm 0.02$                                          | $0.087 \pm 0.03$                                          |
| 1000       | $0.12 \pm 0.02$                                        | 0.94                                                   | $0.048 \pm 0.01$                                          | $0.044 \pm 0.01$                                          |

**Table S2.** Data used in the least-squares regression to Eq. 9 and the resulting values of  $D_{intra\ model}$ .

| $\rho$<br>kPa | $D_{g0}$<br>$m^2s^{-1} (x 10^{-5})$ | $D_{K0}$<br>$m^2s^{-1} (x 10^{-5})$ | $(1-\rho_{surf})$ | $D_{intra}$<br>$m^2s^{-1} (x 10^{-5})$ | $D_{intra\ model}$<br>$m^2s^{-1} (x 10^{-5})$ |
|---------------|-------------------------------------|-------------------------------------|-------------------|----------------------------------------|-----------------------------------------------|
| 10            | $13. \pm 2$                         | 0.94                                | $0.28 \pm 0.06$   | $0.15 \pm 0.03$                        | $0.13 \pm 0.04$                               |
| 30            | $4.0 \pm 0.8$                       | 0.94                                | $0.41 \pm 0.09$   | $0.14 \pm 0.03$                        | $0.17 \pm 0.05$                               |
| 91            | $1.5 \pm 0.3$                       | 0.94                                | $0.35 \pm 0.07$   | $0.12 \pm 0.02$                        | $0.11 \pm 0.03$                               |
| 310           | $0.4 \pm 0.08$                      | 0.94                                | $0.38 \pm 0.08$   | $0.079 \pm 0.02$                       | $0.066 \pm 0.02$                              |
| 1000          | $0.12 \pm 0.02$                     | 0.94                                | $0.75 \pm 0.15$   | $0.048 \pm 0.01$                       | $0.052 \pm 0.02$                              |

**Table S3.** Data used in the least-squares regression to the modified Eq. 9 where  $\eta_K = \eta_g \equiv \eta$  and the resulting values of  $D_{intra\ model}$ .

| $\rho$<br>kPa  | $D_{g0}$<br>$m^2s^{-1} (x 10^{-5})$ | $D_{K0}$<br>$m^2s^{-1} (x 10^{-5})$ | $(1-\rho_{surf})$ | $D_{intra}$<br>$m^2s^{-1} (x 10^{-5})$ | $D_{intra\ model}$<br>$m^2s^{-1} (x 10^{-5})$ |
|----------------|-------------------------------------|-------------------------------------|-------------------|----------------------------------------|-----------------------------------------------|
| 10.            | $13. \pm 2$                         | 0.94                                | $0.28 \pm 0.06$   | $0.15 \pm 0.03$                        | $0.14 \pm 0.04$                               |
| 30.            | $4.0 \pm 0.8$                       | 0.94                                | $0.41 \pm 0.09$   | $0.14 \pm 0.03$                        | $0.18 \pm 0.05$                               |
| 91.            | $1.5 \pm 0.3$                       | 0.94                                | $0.35 \pm 0.07$   | $0.12 \pm 0.02$                        | $0.11 \pm 0.03$                               |
| $310 \pm 50$   | $0.4 \pm 0.08$                      | 0.94                                | $0.38 \pm 0.08$   | $0.079 \pm 0.02$                       | $0.060 \pm 0.02$                              |
| $1000 \pm 150$ | $0.12 \pm 0.02$                     | 0.94                                | $0.75 \pm 0.15$   | $0.048 \pm 0.01$                       | $0.045 \pm 0.01$                              |

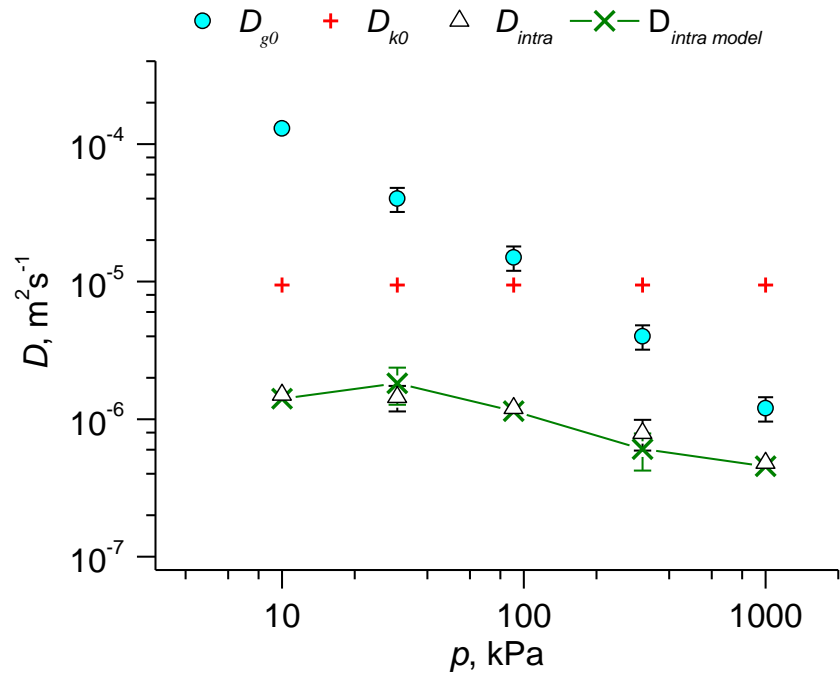

**Figure S1.**  $\text{CO}_2$  self-diffusivity,  $D_{intra}$ , measured by  $^{13}\text{C}$  PFG NMR inside the particles of the studied samaria aerogel catalyst at 297 K and the corresponding theoretical diffusivity,  $D_{intra\ model}$ , obtained by least-squares regression of the diffusion data reported in the figure to the modified Eq. 9 where  $\eta_K = \eta_g \equiv \eta$ . Also shown for comparison are the following self-diffusivities of  $\text{CO}_2$  molecules at 297 K: self-diffusivity in the macroscopic gas volume surrounding the catalyst ( $D_{g0}$ ), and the reference self-diffusivity in the Knudsen regime estimated by using Eq. 2 with  $d = 75$  nm ( $D_{K0}$ ). All diffusivities are presented as a function of the  $\text{CO}_2$  equilibrium pressure in the gas volume surrounding the catalyst particles at 297 K.
